# Supplementary material for: In silico identification of genes involved in selenium metabolism: evidence for a third selenium utilization trait
Source: PubMed Central journal article supplement (PMC2432076; doi:10.1186/1471-2164-9-251), 2008-05-29

# Supplemental figures

## Figure legends

### **Figure S1 - Genomic context of SeID in orphan SeID-containing genomes**

Candidate genes involved in the new selenium utilization trait are color coded. Coding direction is also indicated.

Figure S1

*Anaerostipes caccae*

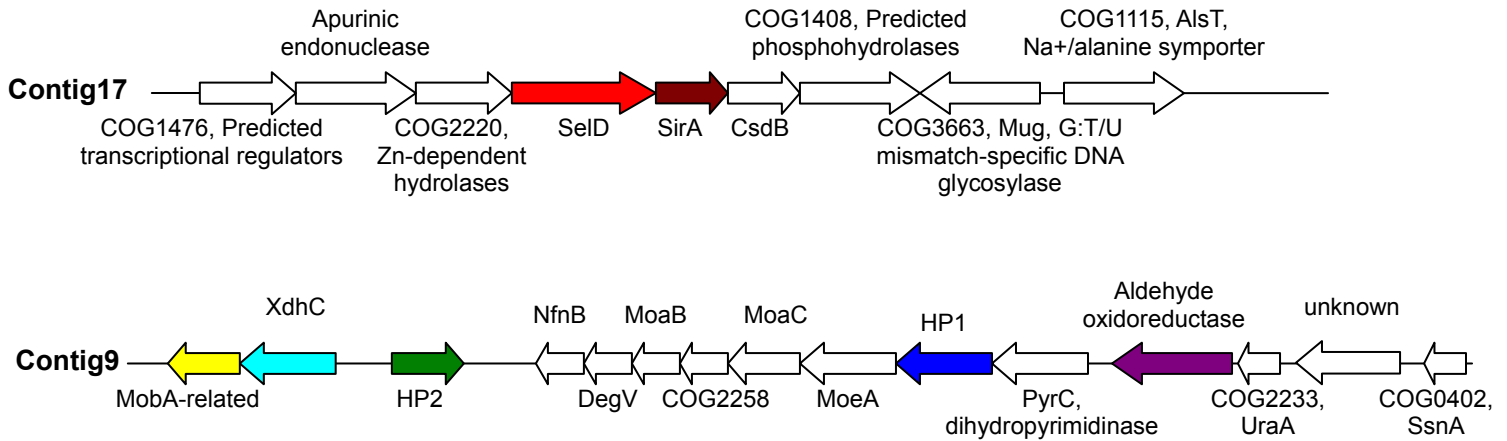

*Ruminococcus obeum*

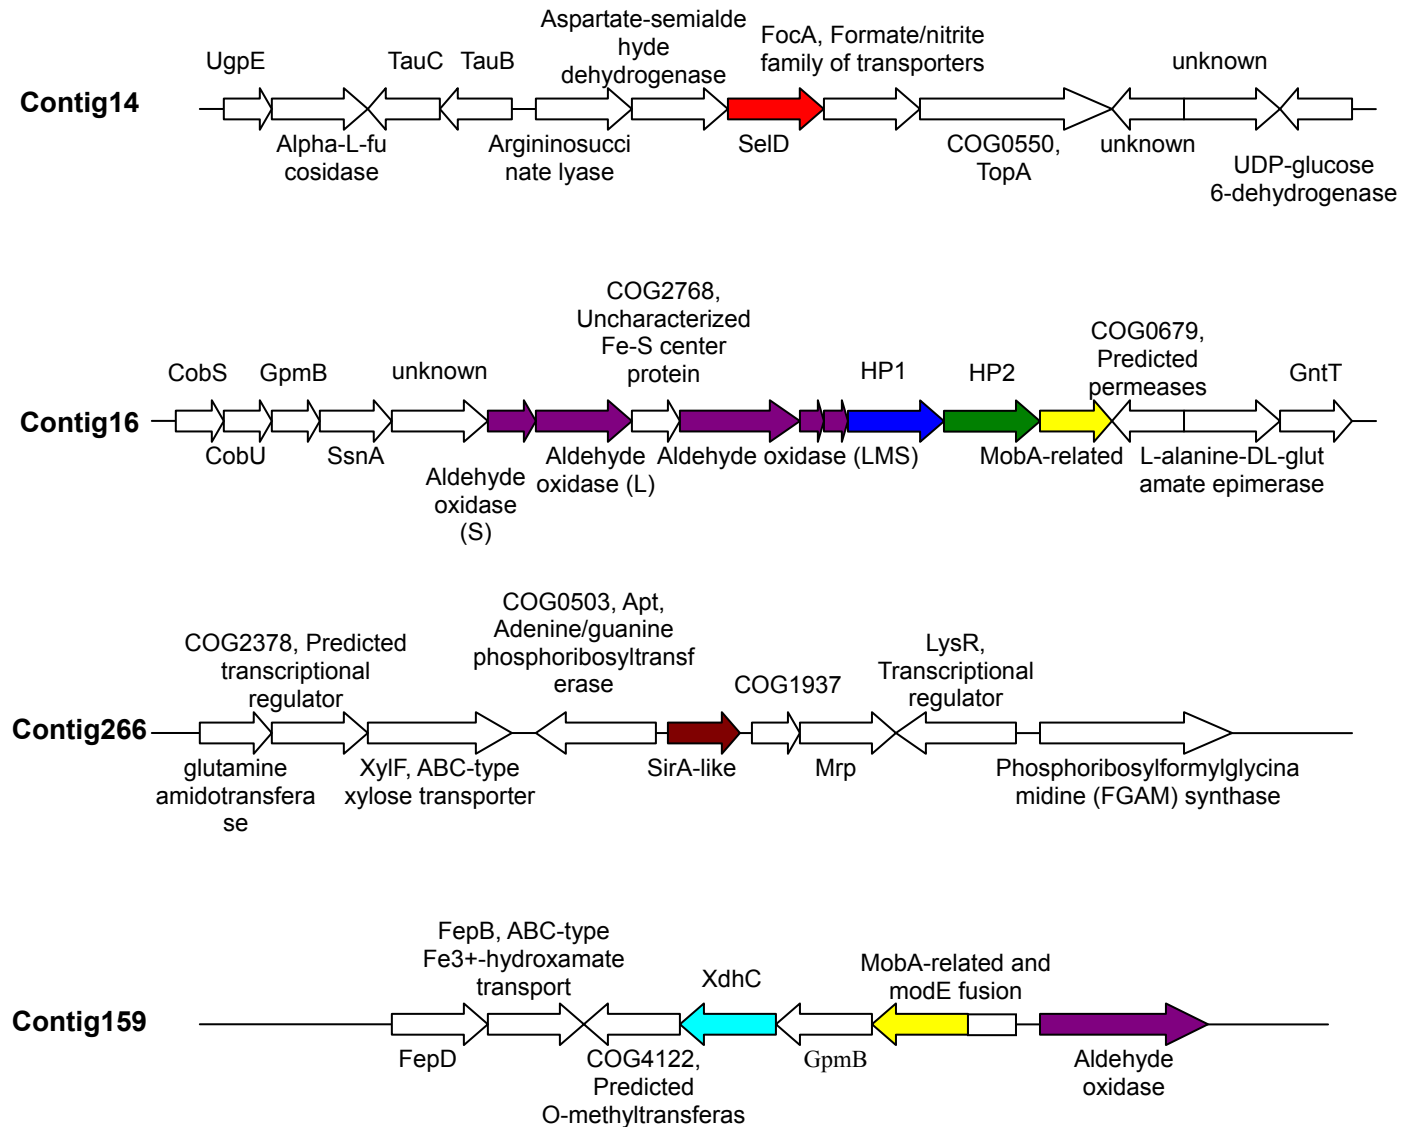

## *Ruminococcus gnavus*

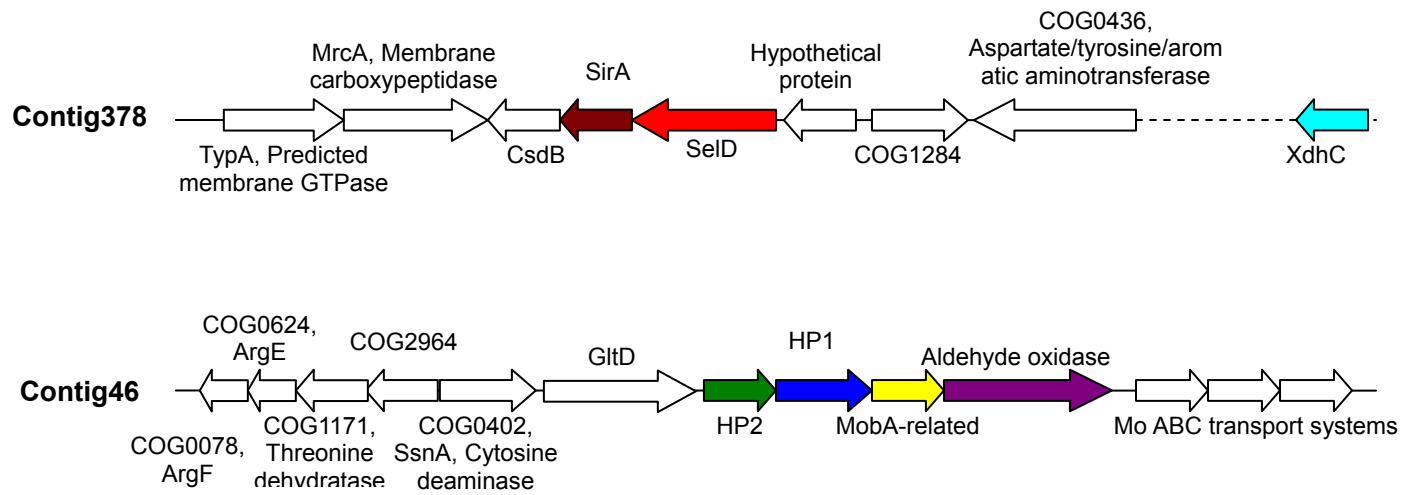

## *Ruminococcus torques*

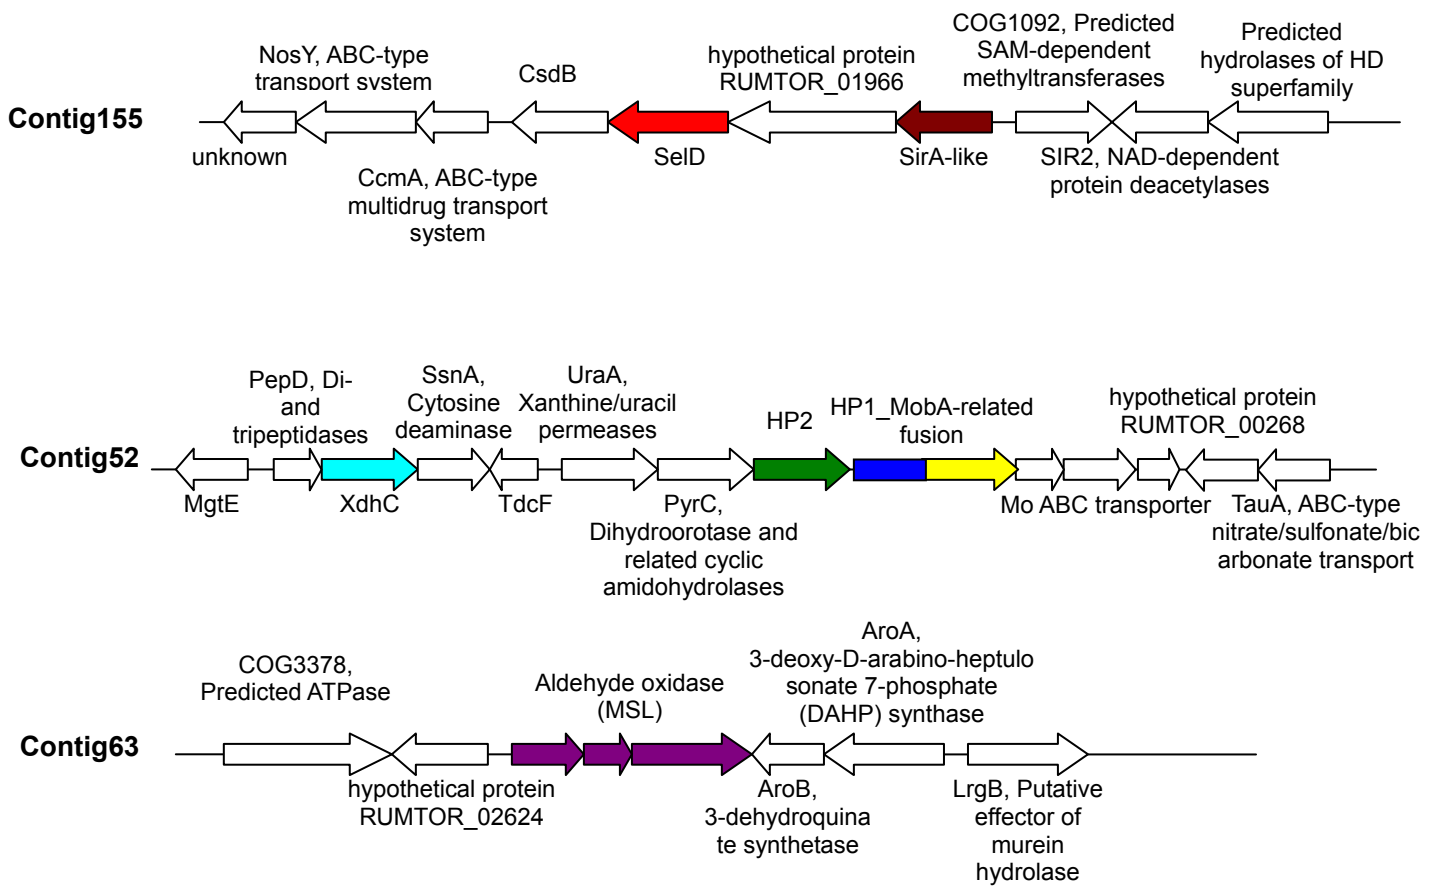

## *Faecalibacterium prausnitzii*

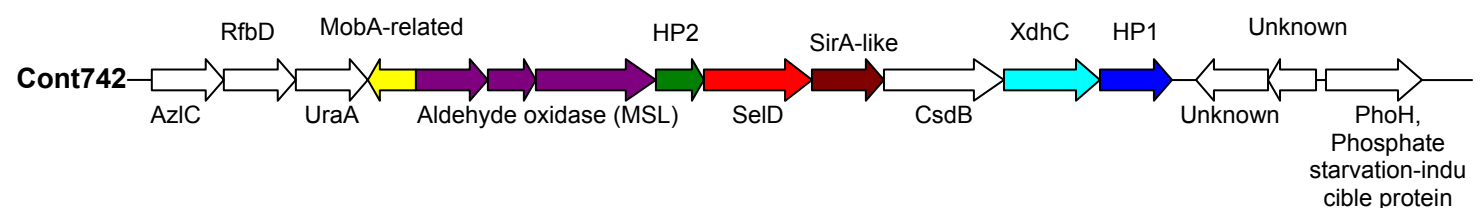

***Vibrio shilonii***

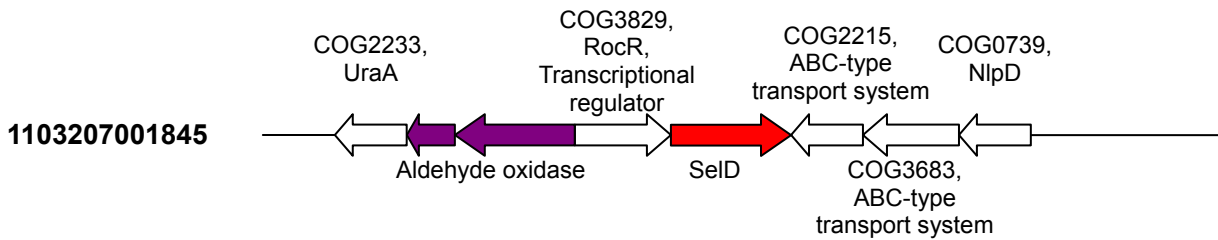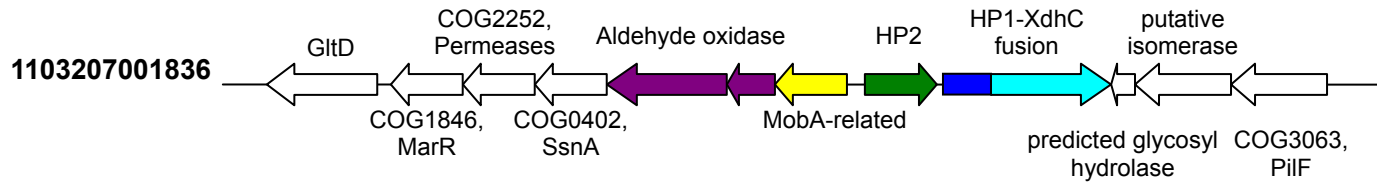

***Clostridium butyricum***

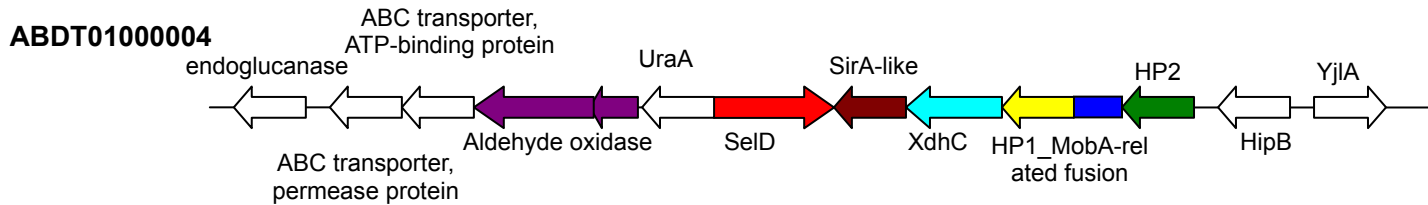

Supplement: 1471-2164-9-251-S1.pdf [file 1471-2164-9-251-S1.pdf]
