# Supplementary material for: In silico identification of genes involved in selenium metabolism: evidence for a third selenium utilization trait
Source: PubMed Central journal article supplement (PMC2432076; doi:10.1186/1471-2164-9-251), 2008-05-29
Supplement: 1471-2164-9-251-S2.pdf [file 1471-2164-9-251-S2.pdf]

**Table S1. Distribution of SeC and SeU utilization trait in prokaryotes**

| Classification        | Organism                            | SeID | Sec trait | Selenouridine trait |
|-----------------------|-------------------------------------|------|-----------|---------------------|
| <b>Bacteria</b>       |                                     |      |           |                     |
| <b>Actinobacteria</b> | <i>Acidothermus cellulolyticus</i>  | -    | -         | -                   |
|                       | <i>Actinomyces odontolyticus</i>    | -    | -         | -                   |
|                       | <i>Arthrobacter aureus</i>          | -    | -         | -                   |
|                       | <i>Arthrobacter</i> sp. FB24        | -    | -         | -                   |
|                       | <i>Bifidobacterium adolescentis</i> | -    | -         | -                   |
|                       | <i>Bifidobacterium longum</i>       | -    | -         | -                   |
|                       | <i>Brevibacterium linens</i>        | +C   | +         | -                   |
|                       | <i>Clavibacter michiganensis</i>    | -    | -         | -                   |
|                       | <i>Collinsella aerofaciens</i>      | +U   | +         | -                   |
|                       | <i>Corynebacterium diphtheriae</i>  | -    | -         | -                   |
|                       | <i>Corynebacterium efficiens</i>    | -    | -         | -                   |
|                       | <i>Corynebacterium glutamicum</i>   | -    | -         | -                   |
|                       | <i>Corynebacterium jeikeium</i>     | -    | -         | -                   |
|                       | <i>Frankia alni</i>                 | -    | -         | -                   |
|                       | <i>Frankia</i> sp. Ccl3             | -    | -         | -                   |
|                       | <i>Janibacter</i> sp.               | -    | -         | -                   |
|                       | <i>Kineococcus radiotolerans</i>    | +C   | +         | -                   |
|                       | <i>Leifsonia xyli</i>               | -    | -         | -                   |
|                       | <i>Mycobacterium avium</i>          | +C   | +         | -                   |
|                       | <i>Mycobacterium bovis</i>          | -    | -         | -                   |
|                       | <i>Mycobacterium flavescens</i>     | -    | -         | -                   |
|                       | <i>Mycobacterium gilvum</i>         | -    | -         | -                   |
|                       | <i>Mycobacterium leprae</i>         | +C   | +         | -                   |
|                       | <i>Mycobacterium smegmatis</i>      | +C   | +         | -                   |
|                       | <i>Mycobacterium</i> sp.            | +C   | +         | -                   |
|                       | <i>Mycobacterium tuberculosis</i>   | -    | -         | -                   |
|                       | <i>Mycobacterium ulcerans</i>       | -    | -         | -                   |
|                       | <i>Mycobacterium vanbaalenii</i>    | -    | -         | -                   |
|                       | <i>Nocardia farcinica</i>           | -    | -         | -                   |
|                       | <i>Nocardioides</i> sp.             | -    | -         | -                   |
|                       | <i>Propionibacterium acnes</i>      | -    | -         | -                   |
|                       | <i>Rhodococcus</i> sp.              | -    | -         | -                   |
|                       | <i>Rubrobacter xylanophilus</i>     | +U   | +         | -                   |
|                       | <i>Saccharopolyspora erythraea</i>  | +C   | +         | -                   |
|                       | <i>Salinispora arenicola</i>        | -    | -         | -                   |

|                      |                                     |    |   |   |
|----------------------|-------------------------------------|----|---|---|
|                      | <i>Salinispora tropica</i>          | +C | + | - |
|                      | <i>Streptomyces avermitilis</i>     | -  | - | - |
|                      | <i>Streptomyces coelicolor</i>      | -  | - | - |
|                      | <i>Thermobifida fusca</i>           | -  | - | - |
|                      | <i>Tropheryma whipplei</i>          | -  | - | - |
|                      | marine actinobacterium PHSC20C1     | -  | - | - |
| <b>Bacteroidetes</b> | <i>Algoriphagus</i> sp.             | +C | - | + |
|                      | <i>Bacteroides caccae</i>           | -  | - | - |
|                      | <i>Bacteroides capillosus</i>       | +C | + | - |
|                      | <i>Bacteroides fragilis</i>         | -  | - | - |
|                      | <i>Bacteroides ovatus</i>           | -  | - | - |
|                      | <i>Bacteroides thetaiotaomicron</i> | -  | - | - |
|                      | <i>Bacteroides uniformis</i>        | -  | - | - |
|                      | <i>Bacteroides vulgatus</i>         | -  | - | - |
|                      | Candidatus <i>Sulcia muelleri</i>   | -  | - | - |
|                      | <i>Cellulophaga</i> sp.             | -  | - | - |
|                      | <i>Croceibacter atlanticus</i>      | -  | - | - |
|                      | <i>Cytophaga hutchinsonii</i>       | -  | - | - |
|                      | <i>Dokdonia donghaensis</i>         | -  | - | - |
|                      | <i>Flavobacteria bacterium</i>      | -  | - | - |
|                      | <i>Flavobacteriales bacterium</i>   | -  | - | - |
|                      | <i>Flavobacterium johnsoniae</i>    | -  | - | - |
|                      | <i>Flavobacterium psychrophilum</i> | -  | - | - |
|                      | <i>Gramella forsetii</i>            | -  | - | - |
|                      | <i>Leeuwenhoekiiella blandensis</i> | -  | - | - |
|                      | <i>Microscilla marina</i>           | -  | - | - |
|                      | <i>Parabacteroides distasonis</i>   | -  | - | - |
|                      | <i>Parabacteroides merdae</i>       | -  | - | - |
|                      | <i>Pedobacter</i> sp. BAL39         | -  | - | - |
|                      | <i>Polaribacter dokdonensis</i>     | +C | - | + |
|                      | <i>Polaribacter irgensii</i>        | +C | - | + |
|                      | <i>Porphyromonas gingivalis</i>     | +C | - | + |
|                      | <i>Psychroflexus torquis</i>        | -  | - | - |
|                      | <i>Robiginitalea biformata</i>      | -  | - | - |
|                      | <i>Salinibacter ruber</i>           | -  | - | - |
|                      | <i>Tenacibaculum</i> sp.            | -  | - | - |
|                      | unidentified eubacterium SCB49      | -  | - | - |
| <b>Chlorobi</b>      | <i>Chlorobium chlorochromatii</i>   | -  | - | - |
|                      | <i>Chlorobium ferrooxidans</i>      | -  | - | - |
|                      | <i>Chlorobium limicola</i>          | -  | - | - |

|                              |                                              |    |   |   |
|------------------------------|----------------------------------------------|----|---|---|
|                              | <i>Chlorobium phaeobacteroides</i>           | -  | - | - |
|                              | <i>Chlorobium tepidum</i>                    | -  | - | - |
|                              | <i>Pelodictyon luteolum</i>                  | -  | - | - |
|                              | <i>Pelodictyon phaeoclathratiforme</i>       | -  | - | - |
|                              | <i>Prosthecochloris aestuarii</i>            | -  | - | - |
|                              | <i>Prosthecochloris vibrioformis</i>         | -  | - | - |
| <b>Chlamydiae</b>            | <i>Candidatus Protochlamydia amoebophila</i> | -  | - | - |
|                              | <i>Chlamydia muridarum</i>                   | -  | - | - |
|                              | <i>Chlamydia trachomatis</i>                 | -  | - | - |
|                              | <i>Chlamydophila abortus</i>                 | -  | - | - |
|                              | <i>Chlamydophila caviae</i>                  | -  | - | - |
|                              | <i>Chlamydophila felis</i>                   | -  | - | - |
|                              | <i>Chlamydophila pneumoniae</i>              | -  | - | - |
| <b>Cyanobacteria</b>         | <i>Acaryochloris marina</i>                  | +C | - | + |
|                              | <i>Anabaena variabilis</i>                   | -  | - | - |
|                              | <i>Crocospaera watsonii</i>                  | +C | - | + |
|                              | <i>Cyanothece</i> sp.                        | +C | - | + |
|                              | <i>Gloeobacter violaceus</i>                 | -  | - | - |
|                              | <i>Leptolyngbya valderiana</i>               | -  | - | - |
|                              | <i>Lyngbya</i> sp.                           | +C | - | + |
|                              | <i>Nodularia spumigena</i>                   | -  | - | - |
|                              | <i>Nostoc punctiforme</i>                    | -  | - | - |
|                              | <i>Nostoc</i> sp.                            | -  | - | - |
|                              | <i>Prochlorococcus marinus</i>               | +C | - | + |
|                              | <i>Synechococcus elongatus</i>               | -  | - | - |
|                              | <i>Synechococcus</i> sp.                     | +C | - | + |
|                              | <i>Synechocystis</i> sp.                     | -  | - | - |
|                              | <i>Thermosynechococcus elongatus</i>         | -  | - | - |
|                              | <i>Trichodesmium erythraeum</i>              | +C | - | + |
| <b>Firmicutes/Bacillales</b> | <i>Bacillus amyloliquefaciens</i>            | -  | - | - |
|                              | <i>Bacillus anthracis</i>                    | -  | - | - |
|                              | <i>Bacillus cereus</i>                       | -  | - | - |
|                              | <i>Bacillus clausii</i>                      | -  | - | - |
|                              | <i>Bacillus coagulans</i>                    | +C | - | + |
|                              | <i>Bacillus halodurans</i>                   | -  | - | - |
|                              | <i>Bacillus licheniformis</i>                | -  | - | - |
|                              | <i>Bacillus pumilus</i>                      | -  | - | - |
|                              | <i>Bacillus</i> sp. NRRL                     | +U | + | + |
|                              | <i>Bacillus subtilis</i>                     | -  | - | - |

|                              |                                             |    |   |   |
|------------------------------|---------------------------------------------|----|---|---|
|                              | <i>Bacillus thuringiensis</i>               | -  | - | - |
|                              | <i>Bacillus weihenstephanensis</i>          | -  | - | - |
|                              | <i>Exiguobacterium sibiricum</i>            | -  | - | - |
|                              | <i>Geobacillus kaustophilus</i>             | -  | - | - |
|                              | <i>Geobacillus thermodenitrificans</i>      | -  | - | - |
|                              | <i>Listeria innocua</i>                     | -  | - | - |
|                              | <i>Listeria monocytogenes</i>               | -  | - | - |
|                              | <i>Listeria welshimeri</i>                  | -  | - | - |
|                              | <i>Oceanobacillus iheyensis</i>             | -  | - | - |
|                              | <i>Paenibacillus larvae</i>                 | +C | - | + |
|                              | <i>Pasteuria nishizawae</i>                 | -  | - | - |
|                              | <i>Staphylococcus aureus</i>                | -  | - | - |
|                              | <i>Staphylococcus epidermidis</i>           | -  | - | - |
|                              | <i>Staphylococcus haemolyticus</i>          | -  | - | - |
|                              | <i>Staphylococcus saprophyticus</i>         | -  | - | - |
| <b>Firmicutes/Clostridia</b> | <i>Alkaliphilus metalliredigens</i>         | +C | + | + |
|                              | <i>Alkaliphilus oremlandii</i>              | +U | + | + |
|                              | <i>Anaerostipes caccae</i>                  | +C | - | - |
|                              | <i>Caldicellulosiruptor saccharolyticus</i> | -  | - | - |
|                              | <i>Carboxydotherrmus hydrogenoformans</i>   | +U | + | + |
|                              | <i>Clostridium acetobutylicum</i>           | -  | - | - |
|                              | <i>Clostridium beijerincki</i>              | -  | - | - |
|                              | <i>Clostridium boltea</i>                   | +U | + | - |
|                              | <i>Clostridium botulinum</i>                | +U | + | - |
|                              | <i>Clostridium butyricum</i>                | +C | - | - |
|                              | <i>Clostridium cellulolyticum</i>           | -  | - | - |
|                              | <i>Clostridium difficile</i>                | +U | + | + |
|                              | <i>Clostridium kluyveri</i>                 | -  | - | - |
|                              | <i>Clostridium leptum</i>                   | -  | - | - |
|                              | <i>Clostridium novyi</i>                    | -  | - | - |
|                              | <i>Clostridium perfringens</i>              | +U | + | + |
|                              | <i>Clostridium phytofermentans</i>          | +C | - | - |
|                              | <i>Clostridium</i> sp. OhILAs               | +U | + | + |
|                              | <i>Clostridium tetani</i>                   | -  | - | - |
|                              | <i>Clostridium thermocellum</i>             | -  | - | - |
|                              | <i>Desulfotobacterium hafniense</i>         | +C | + | - |
|                              | <i>Desulfotomaculum reducens</i>            | +U | + | + |
|                              | <i>Dorea longicatena</i>                    | +U | + | - |

|                                   |                                         |    |   |   |
|-----------------------------------|-----------------------------------------|----|---|---|
|                                   | <i>Epulopiscium</i> sp.                 | +C | - | + |
|                                   | <i>Eubacterium siraeum</i>              | -  | - | - |
|                                   | <i>Eubacterium ventriosum</i>           | -  | - | - |
|                                   | <i>Faecalibacterium prausnitzii</i>     | +C | - | - |
|                                   | <i>Halothermothrix orenii</i>           | -  | - | - |
|                                   | <i>Moorella thermoacetica</i>           | +U | + | - |
|                                   | <i>Pelotomaculum thermopropionicum</i>  | +U | + | + |
|                                   | <i>Peptostreptococcus micros</i>        | +U | + | - |
|                                   | <i>Ruminococcus gnavus</i>              | +C | - | - |
|                                   | <i>Ruminococcus obeum</i>               | +C | - | - |
|                                   | <i>Ruminococcus torques</i>             | +C | - | - |
|                                   | <i>Syntrophomonas wolfei</i>            | +U | + | - |
|                                   | <i>Thermoanaerobacter ethanolicus</i>   | -  | - | - |
|                                   | <i>Thermoanaerobacter tengcongensis</i> | +U | + | + |
|                                   | <i>Thermosinus carboxydivorans</i>      | +U | + | + |
| <b>Firmicutes/Lactobacillales</b> | <i>Enterococcus faecalis</i>            | +C | - | - |
|                                   | <i>Enterococcus faecium</i>             | -  | - | - |
|                                   | <i>Lactobacillus acidophilus</i>        | -  | - | - |
|                                   | <i>Lactobacillus brevis</i>             | -  | - | - |
|                                   | <i>Lactobacillus casei</i>              | -  | - | - |
|                                   | <i>Lactobacillus delbrueckii</i>        | -  | - | - |
|                                   | <i>Lactobacillus gasseri</i>            | -  | - | - |
|                                   | <i>Lactobacillus johnsonii</i>          | -  | - | - |
|                                   | <i>Lactobacillus plantarum</i>          | -  | - | - |
|                                   | <i>Lactobacillus reuteri</i>            | -  | - | - |
|                                   | <i>Lactobacillus sakei</i>              | -  | - | - |
|                                   | <i>Lactobacillus salivarius</i>         | -  | - | - |
|                                   | <i>Lactococcus lactis</i>               | -  | - | - |
|                                   | <i>Leuconostoc mesenteroides</i>        | -  | - | - |
|                                   | <i>Oenococcus oeni</i>                  | -  | - | - |
|                                   | <i>Pediococcus pentosaceus</i>          | -  | - | - |
|                                   | <i>Streptococcus agalactiae</i>         | -  | - | - |
|                                   | <i>Streptococcus gordonii</i>           | -  | - | - |
|                                   | <i>Streptococcus mutans</i>             | -  | - | - |
|                                   | <i>Streptococcus pneumoniae</i>         | -  | - | - |
|                                   | <i>Streptococcus pyogenes</i>           | -  | - | - |
|                                   | <i>Streptococcus sanguinis</i>          | -  | - | - |
|                                   | <i>Streptococcus suis</i>               | -  | - | - |
|                                   | <i>Streptococcus thermophilus</i>       | -  | - | - |

|                              |                                          |    |   |   |
|------------------------------|------------------------------------------|----|---|---|
|                              | <i>Symbiobacterium thermophilum</i>      | +U | + | - |
| <b>Firmicutes/Mollicutes</b> | Aster yellows witches'-broom phytoplasma | -  | - | - |
|                              | <i>Eubacterium dolichum</i>              | -  | - | - |
|                              | <i>Mesoplasma florum</i>                 | -  | - | - |
|                              | <i>Mycoplasma agalactiae</i>             | -  | - | - |
|                              | <i>Mycoplasma capricolum</i>             | -  | - | - |
|                              | <i>Mycoplasma gallisepticum</i>          | -  | - | - |
|                              | <i>Mycoplasma genitalium</i>             | -  | - | - |
|                              | <i>Mycoplasma hyopneumoniae</i>          | -  | - | - |
|                              | <i>Mycoplasma mobile</i>                 | -  | - | - |
|                              | <i>Mycoplasma mycoides</i>               | -  | - | - |
|                              | <i>Mycoplasma penetrans</i>              | -  | - | - |
|                              | <i>Mycoplasma pneumoniae</i>             | -  | - | - |
|                              | <i>Mycoplasma pulmonis</i>               | -  | - | - |
|                              | <i>Mycoplasma synoviae</i>               | -  | - | - |
|                              | Onion yellows phytoplasma                | -  | - | - |
|                              | <i>Ureaplasma parvum</i>                 | -  | - | - |
|                              | <i>Ureaplasma urealyticum</i>            | -  | - | - |
| <b>Acidobacteria</b>         | <i>Acidobacteria bacterium Ellin345</i>  | +U | + | - |
|                              | <i>Solibacter usitatus</i>               | +U | + | - |
| <b>Aquificae</b>             | <i>Aquifex aeolicus</i>                  | +U | + | - |
|                              | <i>Hydrogenobaculum</i> sp. Y04AAS1      | -  | - | - |
| <b>Planctomycetes</b>        | <i>Blastopirellula marina</i>            | -  | - | - |
|                              | <i>Rhodopirellula baltica</i>            | -  | - | - |
|                              | <i>Planctomyces maris</i>                | -  | - | - |
| <b>Chloroflexi</b>           | <i>Chloroflexus aggregans</i>            | -  | - | - |
|                              | <i>Chloroflexus aurantiacus</i>          | +U | + | - |
|                              | <i>Dehalococcoides ethenogenes</i>       | -  | - | - |
|                              | <i>Dehalococcoides</i> sp.               | -  | - | - |
|                              | <i>Roseiflexus</i> sp.                   | -  | - | - |
|                              | <i>Herpetosiphon aurantiacus</i>         | +U | + | - |
|                              | <i>Roseiflexus castenholzii</i>          | -  | - | - |
| <b>Deinococcus-Thermus</b>   | <i>Deinococcus geothermalis</i>          | -  | - | - |
|                              | <i>Deinococcus radiodurans</i>           | -  | - | - |
|                              | <i>Thermus thermophilus</i>              | -  | - | - |
| <b>Fusobacteria</b>          | <i>Fusobacterium nucleatum</i>           | -  | - | - |
| <b>Thermotogae</b>           | <i>Thermosiphon melanesiensis</i>        | -  | - | - |
|                              | <i>Thermotoga lettingae</i>              | -  | - | - |
|                              | <i>Thermotoga maritima</i>               | -  | - | - |

|                                           |                                                                       |    |   |   |
|-------------------------------------------|-----------------------------------------------------------------------|----|---|---|
|                                           | <i>Thermotoga petrophila</i>                                          | -  | - | - |
|                                           | <i>Fervidobacterium nodosum</i>                                       | -  | - | - |
|                                           | <i>Petrotoga mobilis</i>                                              | -  | - | - |
| <b><u>Lentisphaerae</u></b>               | <i>Lentisphaera araneosa</i>                                          | -  | - | - |
|                                           | <i>Victivallis vadensis</i>                                           | -  | - | - |
| <b><u>candidate division TM7</u></b>      | candidate division TM7 isolate TM7a                                   | -  | - | - |
|                                           | candidate division TM7 isolate TM7b                                   | -  | - | - |
|                                           | candidate division TM7 isolate TM7c                                   | -  | - | - |
| <b><u>Verrucomicrobia</u></b>             | Opitutaceae bacterium TAV2                                            | -  | - | - |
| <b>Proteobacteria/others</b>              | <i>Magnetococcus</i> sp.                                              | +C | - | + |
|                                           | <i>Mariprofundus ferrooxydans</i><br>( <i>Siderooxidans marinum</i> ) | -  | - | - |
| <b><u>Proteobacteria/alpha/others</u></b> | <i>Acidiphilium cryptum</i>                                           | -  | - | - |
|                                           | <i>Aurantimonas</i> sp.                                               | -  | - | - |
|                                           | <i>Azorhizobium caulinodans</i>                                       | +C | + | - |
|                                           | <i>Bartonella bacilliformis</i>                                       | -  | - | - |
|                                           | <i>Bartonella henselae</i>                                            | -  | - | - |
|                                           | <i>Bartonella quintana</i>                                            | -  | - | - |
|                                           | <i>Bradyrhizobium japonicum</i>                                       | -  | - | - |
|                                           | <i>Bradyrhizobium</i> sp.                                             | -  | - | - |
|                                           | <i>Brucella abortus</i>                                               | -  | - | - |
|                                           | <i>Brucella melitensis</i>                                            | -  | - | - |
|                                           | <i>Brucella ovis</i>                                                  | -  | - | - |
|                                           | <i>Brucella suis</i>                                                  | -  | - | - |
|                                           | <i>Caulobacter crescentus</i>                                         | -  | - | - |
|                                           | <i>Caulobacter</i> sp.                                                | -  | - | - |
|                                           | <i>Dinoroseobacter shibae</i>                                         | +C | - | + |
|                                           | <i>Erythrobacter litoralis</i>                                        | -  | - | - |
|                                           | <i>Erythrobacter</i> sp.                                              | -  | - | - |
|                                           | <i>Fulvimarina pelagi</i>                                             | -  | - | - |
|                                           | <i>Gluconobacter oxydans</i>                                          | -  | - | - |
|                                           | <i>Granulibacter bethesdensis</i>                                     | -  | - | - |
|                                           | <i>Hyphomonas neptunium</i>                                           | +C | + | + |
|                                           | <i>Jannaschia</i> sp.                                                 | +C | - | + |
|                                           | <i>Labrenzia aggregata</i>                                            | -  | - | - |
|                                           | <i>Loktanelia vestfoldensis</i>                                       | +C | - | + |
|                                           | <i>Magnetospirillum magneticum</i>                                    | -  | - | - |
|                                           | <i>Magnetospirillum magnetotacticum</i>                               | -  | - | - |

|                                          |    |   |   |
|------------------------------------------|----|---|---|
| Maricaulis maris                         | +C | - | + |
| Mesorhizobium loti                       | -  | - | - |
| Mesorhizobium sp.                        | -  | - | - |
| Methylobacterium chloromethanicum        | -  | - | - |
| Methylobacterium extorquens              | -  | - | - |
| Methylobacterium sp.                     | +C | + | - |
| Nitrobacter hamburgensis                 | -  | - | - |
| Nitrobacter sp.                          | -  | - | - |
| Nitrobacter winogradskyi                 | -  | - | - |
| Novosphingobium aromaticivorans          | -  | - | - |
| Oceanicaulis alexandrii                  | +C | - | + |
| Oceanicola batsensis                     | +C | - | + |
| Oceanicola granulosus                    | +C | - | + |
| Ochrobactrum anthropi                    | +C | + | - |
| Paracoccus denitrificans                 | +C | + | + |
| Parvibaculum lavamentivorans             | -  | - | - |
| Parvularcula bermudensis                 | -  | - | - |
| Rhodobacter sphaeroides                  | +C | - | + |
| Rhodobacterales bacterium                | +C | - | + |
| Rhodopseudomonas palustris               | -  | - | - |
| Rhodospirillum rubrum                    | -  | - | - |
| Roseobacter denitrificans                | -  | - | - |
| Roseobacter sp.                          | +C | - | + |
| Roseovarius nubinhibens                  | -  | - | - |
| Roseovarius sp.                          | +C | - | + |
| Sagittula stellata                       | +C | - | + |
| Silicibacter pomeroyi                    | +C | - | + |
| Silicibacter sp.                         | +C | - | + |
| Sphingomonas sp.                         | -  | - | - |
| Sphingomonas wittichii                   | -  | - | - |
| Sphingopyxis alaskensis                  | -  | - | - |
| Stappia aggregata                        | -  | - | - |
| Sulfitobacter sp.                        | +C | + | - |
| Xanthobacter autotrophicus               | +C | + | - |
| Zymomonas mobilis                        | -  | - | - |
| alpha proteobacterium HTCC2255           | -  | - | - |
| <b>Proteobacteria/alpha/Rhizobiaceae</b> |    |   |   |
| <b>e</b> Agrobacterium tumefaciens       | -  | - | - |
| Rhizobium etli                           | -  | - | - |



|                                             |                                       |    |   |   |
|---------------------------------------------|---------------------------------------|----|---|---|
|                                             | <i>Rhizobium leguminosarum</i>        | -  | - | - |
|                                             | <i>Sinorhizobium medicae</i>          | -  | - | - |
|                                             | <i>Sinorhizobium meliloti</i>         | +C | + | - |
| <b>Proteobacteria/alpha/Rickettsiales</b>   | <i>Anaplasma marginale</i>            | -  | - | - |
|                                             | <i>Anaplasma phagocytophilum</i>      | -  | - | - |
|                                             | <i>Candidatus Pelagibacter ubique</i> | -  | - | - |
|                                             | <i>Ehrlichia canis</i>                | -  | - | - |
|                                             | <i>Ehrlichia chaffeensis</i>          | -  | - | - |
|                                             | <i>Ehrlichia ruminantium</i>          | -  | - | - |
|                                             | <i>Neorickettsia sennetsu</i>         | -  | - | - |
|                                             | <i>Orientia tsutsugamushi</i>         | -  | - | - |
|                                             | <i>Rickettsia africae</i>             | -  | - | - |
|                                             | <i>Rickettsia akari</i>               | -  | - | - |
|                                             | <i>Rickettsia bellii</i>              | -  | - | - |
|                                             | <i>Rickettsia canadensis</i>          | -  | - | - |
|                                             | <i>Rickettsia conorii</i>             | -  | - | - |
|                                             | <i>Rickettsia felis</i>               | -  | - | - |
|                                             | <i>Rickettsia massiliae</i>           | -  | - | - |
|                                             | <i>Rickettsia prowazekii</i>          | -  | - | - |
|                                             | <i>Rickettsia rickettsii</i>          | -  | - | - |
|                                             | <i>Rickettsia sibirica</i>            | -  | - | - |
|                                             | <i>Rickettsia typhi</i>               | -  | - | - |
|                                             | <i>Wolbachia endosymbiont</i>         | -  | - | - |
| <b>Proteobacteria/beta/Bordetella</b>       | <i>Bordetella bronchiseptica</i>      | +C | - | + |
|                                             | <i>Bordetella parapertussis</i>       | -  | - | - |
|                                             | <i>Bordetella pertussis</i>           | -  | - | - |
| <b>Proteobacteria/beta/Burkholderiaceae</b> | <i>Burkholderia ambifaria</i>         | +C | + | + |
|                                             | <i>Burkholderia cenocepacia</i>       | +C | + | + |
|                                             | <i>Burkholderia dolosa</i>            | +C | + | + |
|                                             | <i>Burkholderia mallei</i>            | +C | + | - |
|                                             | <i>Burkholderia multivorans</i>       | +C | + | + |
|                                             | <i>Burkholderia oklahomensis</i>      | +C | + | + |
|                                             | <i>Burkholderia phymatum</i>          | +C | + | + |
|                                             | <i>Burkholderia phytofirmans</i>      | +C | + | + |
|                                             | <i>Burkholderia pseudomallei</i>      | +C | + | + |
|                                             | <i>Burkholderia</i> sp. 383           | +C | + | + |
|                                             | <i>Burkholderia thailandensis</i>     | +C | + | + |

|                                          |                                            |    |   |   |
|------------------------------------------|--------------------------------------------|----|---|---|
|                                          | <i>Burkholderia ubonensis</i>              | +C | + | + |
|                                          | <i>Burkholderia vietnamiensis</i>          | +C | + | + |
|                                          | <i>Burkholderia xenovorans</i>             | +C | + | + |
|                                          | <i>Limnobacter</i> sp.                     | +C | - | + |
|                                          | <i>Polynucleobacter</i> sp.                | +C | - | + |
|                                          | <i>Ralstonia eutropha</i>                  | +C | - | + |
|                                          | <i>Ralstonia metallidurans</i>             | +C | - | + |
|                                          | <i>Ralstonia pickettii</i>                 | -  | - | - |
|                                          | <i>Ralstonia solanacearum</i>              | -  | - | - |
| <b>Proteobacteria/beta/Neisseriaceae</b> | <i>Chromobacterium violaceum</i>           | -  | - | - |
|                                          | <i>Neisseria gonorrhoeae</i>               | -  | - | - |
|                                          | <i>Neisseria meningitidis</i>              | -  | - | - |
| <b>Proteobacteria/beta/others</b>        | <i>Acidovorax avenae</i>                   | -  | - | - |
|                                          | <i>Acidovorax</i> sp.                      | +C | - | + |
|                                          | <i>Azoarcus</i> sp.                        | +C | - | + |
|                                          | <i>Comamonas testosteroni</i>              | +C | + | + |
|                                          | <i>Dechloromonas aromatica</i>             | +C | + | + |
|                                          | <i>Delftia acidovorans</i>                 | +C | + | + |
|                                          | <i>Herminiimonas arsenicoxydans</i>        | +C | - | + |
|                                          | <i>Janthinobacterium</i> sp.               | +C | - | + |
|                                          | <i>Methylibium petroleiphilum</i>          | +C | - | + |
|                                          | <i>Methylobacillus flagellatus</i>         | -  | - | - |
|                                          | <i>Methylophilales bacterium</i>           | -  | - | - |
|                                          | <i>Nitrosomonas europaea</i>               | +C | - | + |
|                                          | <i>Nitrosomonas eutropha</i>               | +C | - | + |
|                                          | <i>Nitrospira multiformis</i>              | -  | - | - |
|                                          | <i>Polaromonas naphthalenivorans</i>       | +C | - | + |
|                                          | <i>Polaromonas</i> sp.                     | +C | - | + |
|                                          | <i>Rhodiferax ferrireducens</i>            | +C | - | + |
|                                          | <i>Thiobacillus denitrificans</i>          | +C | - | + |
|                                          | <i>Verminephrobacter eiseniae</i>          | +C | - | + |
| <b>Proteobacteria/delta</b>              | <i>Anaeromyxobacter dehalogenans</i>       | +U | + | - |
|                                          | <i>Anaeromyxobacter</i> sp.                | +U | + | - |
|                                          | <i>Bdellovibrio bacteriovorus</i>          | +C | - | + |
|                                          | <i>Candidatus Desulfococcus oleovorans</i> | +U | + | - |
|                                          | <i>Desulfotalea psychrophila</i>           | +U | + | + |
|                                          | <i>Desulfovibrio desulfuricans</i>         | +U | + | - |
|                                          | <i>Desulfovibrio vulgaris</i>              | +U | + | + |

|                                               |                                     |    |   |   |
|-----------------------------------------------|-------------------------------------|----|---|---|
|                                               | <i>Desulfuromonas acetoxidans</i>   | +U | + | + |
|                                               | <i>Geobacter bemidjiensis</i>       | +U | + | + |
|                                               | <i>Geobacter lovleyi</i>            | +U | + | + |
|                                               | <i>Geobacter metallireducens</i>    | +U | + | + |
|                                               | <i>Geobacter</i> sp. FRC-32         | +U | + | + |
|                                               | <i>Geobacter sulfurreducens</i>     | +U | + | + |
|                                               | <i>Geobacter uraniumreducens</i>    | +U | + | + |
|                                               | <i>Lawsonia intracellularis</i>     | -  | + | - |
|                                               | <i>Myxococcus xanthus</i>           | +C | + | - |
|                                               | <i>Pelobacter carbinolicus</i>      | +U | + | + |
|                                               | <i>Pelobacter propionicus</i>       | +C | - | + |
|                                               | <i>Plesiocystis pacifica</i>        | +C | + | - |
|                                               | <i>Stigmatella aurantiaca</i>       | +C | + | - |
|                                               | <i>Syntrophobacter fumaroxidans</i> | +U | + | - |
|                                               | <i>Syntrophus aciditrophicus</i>    | +U | + | - |
|                                               | delta proteobacterium MLMS-1        | +U | + | - |
| <b>Proteobacteria/epsilon</b>                 | <i>Arcobacter butzleri</i>          | +C | + | - |
|                                               | <i>Caminiobacter mediatlanticus</i> | +U | + | - |
|                                               | <i>Campylobacter coli</i>           | +U | + | + |
|                                               | <i>Campylobacter concisus</i>       | +U | + | + |
|                                               | <i>Campylobacter curvus</i>         | +U | + | + |
|                                               | <i>Campylobacter fetus</i>          | +U | + | - |
|                                               | <i>Campylobacter hominis</i>        | +U | + | - |
|                                               | <i>Campylobacter jejuni</i>         | +U | + | + |
|                                               | <i>Campylobacter lari</i>           | +U | + | + |
|                                               | <i>Campylobacter upsaliensis</i>    | +U | + | + |
|                                               | <i>Helicobacter acinonychis</i>     | -  | - | - |
|                                               | <i>Helicobacter hepaticus</i>       | +C | + | - |
|                                               | <i>Helicobacter pylori</i>          | -  | - | - |
|                                               | <i>Nitratiruptor</i> sp.            | -  | - | - |
|                                               | <i>Sulfurovum</i> sp.               | +C | - | + |
|                                               | <i>Thiomicrospira denitrificans</i> | +U | + | + |
|                                               | <i>Wolinella succinogenes</i>       | +C | + | + |
| <b>Proteobacteria/gamma/Enterobacteriales</b> | <i>Buchnera aphidicola</i>          | -  | - | - |
|                                               | <i>Candidatus Blochmannia</i>       | -  | - | - |
|                                               | <i>Citrobacter koseri</i>           | +C | + | + |
|                                               | <i>Enterobacter sakazakii</i>       | +C | + | + |
|                                               | <i>Enterobacter</i> sp.             | +C | + | + |

|                                                            |    |   |   |
|------------------------------------------------------------|----|---|---|
| Erwinia carotovora                                         | -  | - | - |
| Escherichia coli                                           | +C | + | + |
| Klebsiella pneumoniae                                      | +C | + | + |
| Photobacterium luminescens                                 | +C | + | - |
| Salmonella enterica                                        | +C | + | + |
| Salmonella typhimurium                                     | +C | + | + |
| Serratia proteamaculans                                    | +C | + | + |
| Shigella boydii                                            | +C | + | + |
| Shigella dysenteriae                                       | +C | + | + |
| Shigella flexneri 2a                                       | +C | + | + |
| Shigella sonnei                                            | +C | + | + |
| Sodalis glossinidius                                       | -  | - | - |
| Wigglesworthia glossinidia                                 | -  | - | - |
| Yersinia bercovieri                                        | +C | + | - |
| Yersinia enterocolitica                                    | +C | + | - |
| Yersinia frederiksenii                                     | +C | + | - |
| Yersinia intermedia                                        | +C | + | - |
| Yersinia mollaretii                                        | +C | + | - |
| Yersinia pestis KIM                                        | +C | + | - |
| Yersinia pseudotuberculosis                                | +C | + | - |
| <b>Proteobacteria/gamma/Others</b> Acinetobacter baumannii | -  | - | - |
| Acinetobacter sp.                                          | -  | - | - |
| Aeromonas hydrophila                                       | +C | + | + |
| Aeromonas salmonicida                                      | +C | + | + |
| Alcanivorax borkumensis                                    | +C | - | + |
| Alkalilimnicola ehrlichei                                  | -  | - | - |
| Alteromonadales bacterium                                  | -  | - | - |
| Alteromonas macleodii                                      | -  | - | - |
| Baumannia cicadellinicola                                  | -  | - | - |
| Beggiatoa sp.                                              | -  | - | - |
| Candidatus Carsonella                                      | -  | - | - |
| Candidatus Ruthia magnifica                                | -  | - | - |
| Candidatus Vesicomysocius                                  | -  | - | - |
| Chromohalobacter salexigens                                | +C | - | + |
| Colwellia psychrerythraea                                  | +C | - | + |
| gamma proteobacterium<br>(Congregibacter litoralis) KT 71  | +C | - | + |
| Coxiella burnetii                                          | -  | - | - |

|                                |    |   |   |
|--------------------------------|----|---|---|
| Dichelobacter nodosus          | -  | - | - |
| Endoriftia persephone          | -  | - | - |
| Francisella tularensis         | -  | - | - |
| Hahella chejuensis             | +C | - | + |
| Halorhodospira halophila       | -  | - | - |
| Idiomarina baltica             | -  | - | - |
| Idiomarina loihiensis          | -  | - | - |
| Legionella pneumophila         | -  | - | - |
| Marinobacter algicola          | +C | - | + |
| Marinobacter aquaeolei         | +C | - | + |
| Marinobacter sp.               | +C | - | + |
| Marinomonas sp.                | -  | - | - |
| Methylococcus capsulatus       | -  | - | - |
| Moritella sp.                  | -  | - | - |
| Neptuniibacter caesariensis    | -  | - | - |
| Nitrococcus mobilis            | -  | - | - |
| Nitrosococcus oceani           | -  | - | - |
| Oceanobacter sp.               | -  | - | - |
| Pseudoalteromonas atlantica    | -  | - | - |
| Pseudoalteromonas haloplanktis | -  | - | - |
| Pseudoalteromonas tunicata     | -  | - | - |
| Psychrobacter arcticus         | -  | - | - |
| Psychrobacter cryohalolentis   | -  | - | - |
| Psychrobacter sp.              | -  | - | - |
| Psychromonas ingrahamii        | +C | - | + |
| Psychromonas sp.               | +C | + | + |
| Reinekea sp.                   | +C | - | + |
| Rickettsiella grylli           | -  | - | - |
| Saccharophagus degradans       | -  | - | - |
| Shewanella amazonensis         | +C | - | + |
| Shewanella baltica             | +C | + | + |
| Shewanella denitrificans       | +C | - | + |
| Shewanella frigidimarina       | +C | - | + |
| Shewanella loihica             | +C | - | + |
| Shewanella oneidensis          | +C | + | + |
| Shewanella pealeana            | +C | + | + |
| Shewanella putrefaciens        | +C | - | + |
| Shewanella sediminis           | +C | - | + |
| Shewanella sp.                 | +C | + | + |
| Shewanella woodyi              | +C | - | + |

|                                              |                                          |    |   |   |
|----------------------------------------------|------------------------------------------|----|---|---|
|                                              | <i>Thiomicrospira crunogena</i>          | +C | - | + |
|                                              | Vibrionales bacterium                    | -  | - | - |
|                                              | marine gamma proteobacterium<br>HTCC2080 | +C | + | + |
|                                              | marine gamma proteobacterium<br>HTCC2143 | +C | + | + |
|                                              | marine gamma proteobacterium<br>HTCC2207 | +C | - | + |
| <b>Proteobacteria/gamma/Pasteurellaceae</b>  | <i>Actinobacillus pleuropneumoniae</i>   | +U | + | - |
|                                              | <i>Actinobacillus succinogenes</i>       | +U | + | - |
|                                              | <i>Haemophilus ducreyi</i>               | +U | + | - |
|                                              | <i>Haemophilus influenzae</i>            | +U | + | - |
|                                              | <i>Haemophilus somnus</i>                | -  | - | - |
|                                              | <i>Mannheimia haemolytica</i>            | +U | + | - |
|                                              | <i>Mannheimia succiniciproducens</i>     | +U | + | - |
|                                              | <i>Pasteurella multocida</i>             | +C | + | - |
| <b>Proteobacteria/gamma/Pseudomonadaceae</b> | <i>Azotobacter vinelandii</i>            | +C | - | + |
|                                              | <i>Pseudomonas aeruginosa</i>            | +C | + | + |
|                                              | <i>Pseudomonas entomophila</i>           | +C | + | + |
|                                              | <i>Pseudomonas fluorescens</i> PfO-1     | +C | + | + |
|                                              | <i>Pseudomonas mendocina</i>             | +C | - | + |
|                                              | <i>Pseudomonas putida</i>                | +C | + | + |
|                                              | <i>Pseudomonas stutzeri</i>              | +C | + | + |
|                                              | <i>Pseudomonas syringae</i>              | +C | - | + |
| <b>Proteobacteria/gamma/Vibrionaceae</b>     | <i>Photobacterium profundum</i>          | +U | + | + |
|                                              | <i>Photobacterium</i> sp.                | +C | + | + |
|                                              | <i>Vibrio alginolyticus</i>              | -  | - | - |
|                                              | <i>Vibrio angustum</i>                   | +C | + | + |
|                                              | <i>Vibrio cholerae</i>                   | -  | - | - |
|                                              | <i>Vibrio fischeri</i>                   | -  | - | - |
|                                              | <i>Vibrio harveyi</i>                    | -  | - | - |
|                                              | <i>Vibrio parahaemolyticus</i>           | -  | - | - |
|                                              | <i>Vibrio shilonii</i>                   | +C | - | - |
|                                              | <i>Vibrio</i> sp.                        | -  | - | - |
|                                              | <i>Vibrio splendidus</i>                 | -  | - | - |
|                                              | <i>Vibrio vulnificus</i>                 | -  | - | - |
| <b>Proteobacteria/gamma/Xanthomonadaceae</b> | <i>Stenotrophomonas maltophilia</i>      | +C | + | - |
|                                              | <i>Xanthomonas axonopodis</i>            | -  | - | - |

|                                         |                                               |    |   |   |
|-----------------------------------------|-----------------------------------------------|----|---|---|
|                                         | <i>Xanthomonas campestris</i>                 | -  | - | - |
|                                         | <i>Xanthomonas oryzae</i>                     | -  | - | - |
|                                         | <i>Xylella fastidiosa</i>                     | -  | - | - |
| <b>Spirochaetales</b>                   | <i>Borrelia afzelii</i>                       | -  | - | - |
|                                         | <i>Borrelia burgdorferi</i>                   | -  | - | - |
|                                         | <i>Borrelia garinii</i>                       | -  | - | - |
|                                         | <i>Borrelia valaisiana</i>                    | -  | - | - |
|                                         | <i>Leptospira borgpetersenii</i>              | -  | - | - |
|                                         | <i>Leptospira interrogans</i>                 | -  | - | - |
|                                         | <i>Treponema denticola</i>                    | +U | + | - |
|                                         | <i>Treponema pallidum</i>                     | -  | - | - |
| <b>Archaea</b>                          |                                               |    |   |   |
| <b>Crenarchaeota/Desulfurococcales</b>  | <i>Aeropyrum pernix</i>                       | -  | - | - |
|                                         | <i>Hyperthermus butylicus</i>                 | -  | - | - |
|                                         | <i>Ignicoccus hospitalis</i>                  | -  | - | - |
|                                         | <i>Staphylothermus marinus</i>                | -  | - | - |
| <b>Crenarchaeota/Sulfolobales</b>       | <i>Metallosphaera sedula</i>                  | -  | - | - |
|                                         | <i>Sulfolobus acidocaldarius</i>              | -  | - | - |
|                                         | <i>Sulfolobus solfataricus</i>                | -  | - | - |
|                                         | <i>Sulfolobus tokodaii</i>                    | -  | - | - |
| <b>Crenarchaeota/Thermoproteales</b>    | <i>Caldivirga maquilingensis</i>              | -  | - | - |
|                                         | <i>Pyrobaculum aerophilum</i>                 | -  | - | - |
|                                         | <i>Pyrobaculum arsenaticum</i>                | -  | - | - |
|                                         | <i>Pyrobaculum calidifontis</i>               | -  | - | - |
|                                         | <i>Pyrobaculum islandicum</i>                 | -  | - | - |
|                                         | <i>Thermofilum pendens</i>                    | -  | - | - |
| <b>Euryarchaeota/Archaeoglobales</b>    | <i>Archaeoglobus fulgidus</i>                 | -  | - | - |
| <b>Euryarchaeota/Halobacteriales</b>    | <i>Haloarcula marismortui</i>                 | +C | - | - |
|                                         | <i>Halobacterium</i> sp.                      | -  | - | - |
|                                         | <i>Haloquadratum walsbyi</i>                  | -  | - | - |
|                                         | <i>Halorubrum lacusprofundi</i>               | -  | - | - |
|                                         | <i>Natronomonas pharaonis</i>                 | -  | - | - |
| <b>Euryarchaeota/Methanobacteriales</b> | <i>Methanobrevibacter smithii</i>             | -  | - | - |
|                                         | <i>Methanosphaera stadtmanae</i>              | -  | - | - |
|                                         | <i>Methanothermobacter thermautotrophicus</i> | -  | - | - |
| <b>Euryarchaeota/Methanococcales</b>    | <i>Methanocaldococcus jannaschii</i>          | +U | + | + |

|                                         |                                 |    |   |   |
|-----------------------------------------|---------------------------------|----|---|---|
|                                         | Methanococcus aeolicus          | +U | + | + |
|                                         | Methanococcus maripaludis C5    | +U | + | + |
|                                         | Methanococcus maripaludis C7    | +U | + | + |
|                                         | Methanococcus maripaludis S2    | +U | + | + |
|                                         | Methanococcus vannielii         | +U | + | + |
| <b>Euryarchaeota/Methanomicrobiales</b> | Candidatus Methanoregula boonei | -  | - | - |
|                                         | Methanocorpusculum labreanum    | -  | - | - |
|                                         | Methanoculleus marisnigri       | -  | - | - |
|                                         | Methanospirillum hungatei       | -  | - | - |
| <b>Euryarchaeota/Methanopyrales</b>     | Methanopyrus kandleri           | +U | + | - |
| <b>Euryarchaeota/Methanosarcinales</b>  | Methanococcoides burtonii       | -  | - | - |
|                                         | Methanosaeta thermophila        | -  | - | - |
|                                         | Methanosarcina acetivorans      | -  | - | - |
|                                         | Methanosarcina barkeri          | -  | - | - |
|                                         | Methanosarcina mazei            | -  | - | - |
| <b>Euryarchaeota/Thermococcales</b>     | Pyrococcus abyssi               | -  | - | - |
|                                         | Pyrococcus furiosus             | -  | - | - |
|                                         | Pyrococcus horikoshii           | -  | - | - |
|                                         | Thermococcus kodakarensis       | -  | - | - |
| <b>Euryarchaeota/Thermoplasmatales</b>  | Ferroplasma acidarmanus         | -  | - | - |
|                                         | Picrophilus torridus            | -  | - | - |
|                                         | Thermoplasma acidophilum        | -  | - | - |
|                                         | Thermoplasma volcanium          | -  | - | - |
| <b>Nanoarchaeota</b>                    | Nanoarchaeum equitans           | -  | - | - |

**Note: +C: Cys-containing SeID**

**+U: Sec-containing SeID**
